# Supplementary material
Source: publisher figshare collection journal article supplement (https://karger.figshare.com/articles/dataset/_/14350289)
Supplement: Supplementary file 1 [file 1]

**Supplementary Table S1. Distribution of positive immunostaining markers in the three phenotypes.**

|                  |      |      |      | N  |
|------------------|------|------|------|----|
| G type (n = 4)   |      |      |      |    |
| MUC5AC           | MUC6 | MUC2 | CD10 | 0  |
| MUC5AC           | MUC6 | MUC2 | CD10 | 0  |
| MUC5AC           | MUC6 | MUC2 | CD10 | 4  |
| GI type (n = 32) |      |      |      |    |
| MUC5AC           | MUC6 | MUC2 | CD10 | 3  |
| MUC5AC           | MUC6 | MUC2 | CD10 | 13 |
| MUC5AC           | MUC6 | MUC2 | CD10 | 4  |
| MUC5AC           | MUC6 | MUC2 | CD10 | 3  |
| MUC5AC           | MUC6 | MUC2 | CD10 | 7  |
| MUC5AC           | MUC6 | MUC2 | CD10 | 2  |
| I type (n = 62)  |      |      |      |    |
| MUC5AC           | MUC6 | MUC2 | CD10 | 3  |
| MUC5AC           | MUC6 | MUC2 | CD10 | 39 |
| MUC5AC           | MUC6 | MUC2 | CD10 | 20 |

Positive staining is shown in black text and negative staining is done in gray text.
