# Supplementary material
Source: publisher figshare collection journal article supplement (https://karger.figshare.com/articles/dataset/_/14350289)
Supplement: Supplementary file 2 [file 1]

a.

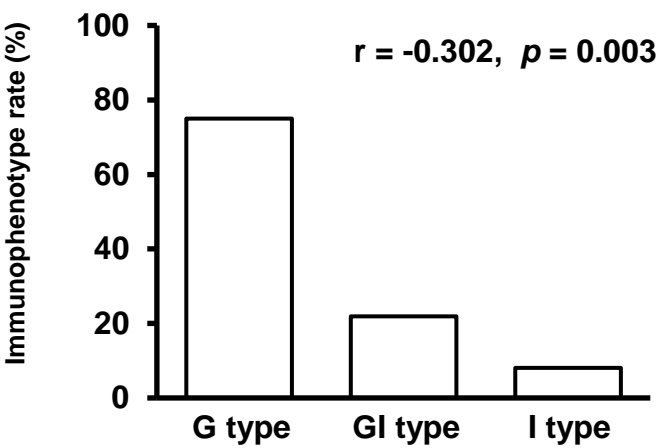

b.

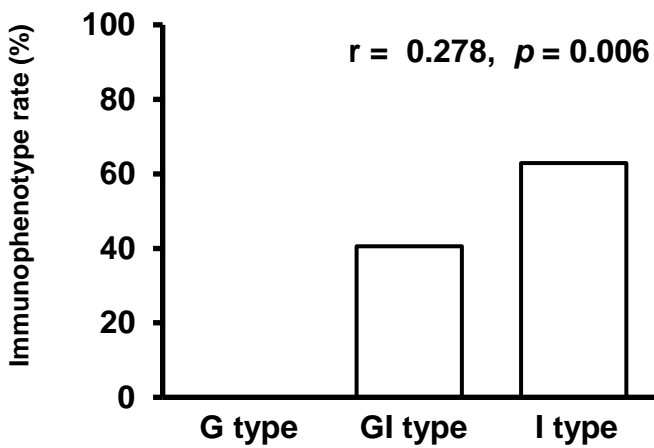

**Supplementary Fig. S1. Tumor location according to immunophenotype**  
**a. Distribution rate in the bulb, b. Distribution rate in the anal side of papilla.**  
G type, gastric phenotype; GI type, gastrointestinal phenotype; I type, intestinal phenotype

a.

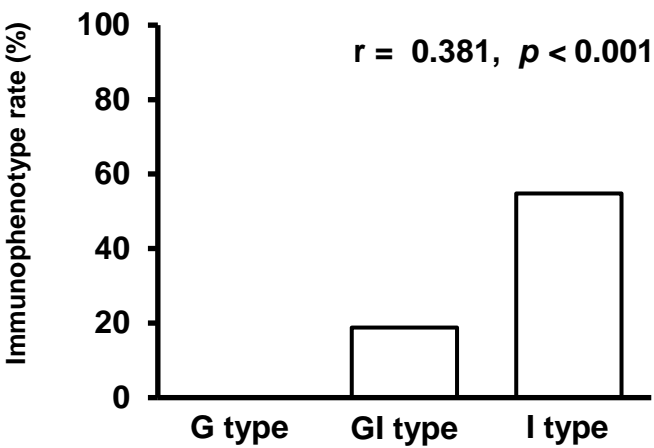

b.

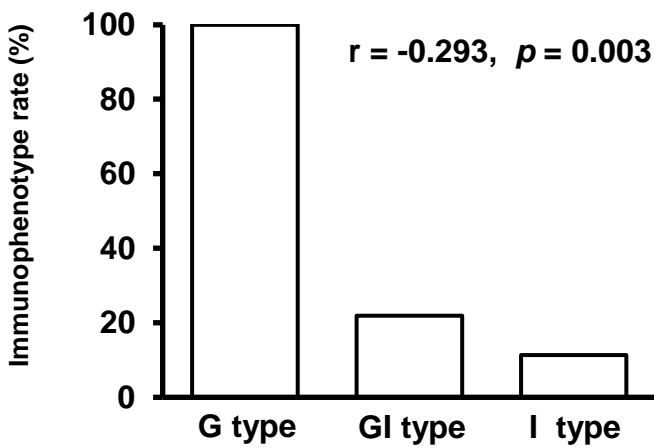

**Supplementary Fig. S2. WOS type according to immunophenotype**  
**a. The rate of tumor with diffuse WOS, b. The rate of tumor with no WOS.**  
G type, gastric phenotype; GI type, gastrointestinal phenotype; I type, intestinal phenotype.  
WOS, white opaque substance.
